# Supplementary material
Source: PubMed Central journal article supplement (PMC2690020)
Supplement: 0900206106_ST1_PDF.pdf [file 0900206106_ST1_PDF.pdf]

**Table S1. Segregation analysis of *gr1-1* (A) and *gr1-2* (B)**

| <b>A:</b>                                                                    | Parent plant genotype |   | Progeny genotype |                  |                    |
|------------------------------------------------------------------------------|-----------------------|---|------------------|------------------|--------------------|
|                                                                              | <i>GR1/gr1-1</i>      | → | <i>GR1/GR1</i>   | <i>GR1/gr1-1</i> | <i>gr1-1/gr1-1</i> |
|                                                                              | Frequency             |   | <b>11</b>        | <b>18</b>        | <b>11</b>          |
| 40 progeny were genotyped by PCR. $\chi^2$ for 1:2:1 segregation: 0.4; P>0.5 |                       |   |                  |                  |                    |
| <b>B:</b>                                                                    | Parent plant genotype |   | Progeny genotype |                  |                    |
|                                                                              | <i>GR1/gr1-2</i>      | → | <i>GR1/GR1</i>   | <i>GR1/gr1-2</i> | <i>gr1-2/gr1-2</i> |
|                                                                              | Frequency             |   | <b>8</b>         | <b>16</b>        | <b>6</b>           |
| 30 progeny were genotyped by PCR. $\chi^2$ for 1:2:1 segregation: 0.4; P>0.5 |                       |   |                  |                  |                    |
