# Supplementary material
Source: PubMed Central journal article supplement (PMC2690020)
Supplement: 0900206106_ST2_PDF.pdf [file 0900206106_ST2_PDF.pdf]

**Table S2. Segregation analysis of *gr1-1* (A) and *gr1-2* (B) mutant allele in a homozygous *ntra ntrb* mutant**

| <b>A:</b>                                                                     | Parent plant genotype |   | Progeny genotype |                  |                    |
|-------------------------------------------------------------------------------|-----------------------|---|------------------|------------------|--------------------|
|                                                                               | <i>GR1/gr1-1</i>      |   | <i>GR1/GR1</i>   | <i>GR1/gr1-1</i> | <i>gr1-1/gr1-1</i> |
|                                                                               | <i>ntra/ntra</i>      | → | <i>ntra/ntra</i> | <i>ntra/ntra</i> | <i>ntra/ntra</i>   |
|                                                                               | <i>ntrb/ntrb</i>      |   | <i>ntrb/ntrb</i> | <i>ntrb/ntrb</i> | <i>ntrb/ntrb</i>   |
|                                                                               | Frequency             |   | <b>22</b>        | <b>20</b>        | <b>0</b>           |
| 42 progeny were genotyped by PCR. $\chi^2$ for 1:1 segregation: 0.095; P=0.76 |                       |   |                  |                  |                    |
| <b>B:</b>                                                                     | Parent plant genotype |   | Progeny genotype |                  |                    |
|                                                                               | <i>GR1/gr1-2</i>      |   | <i>GR1/GR1</i>   | <i>GR1/gr1-2</i> | <i>gr1-2/gr1-2</i> |
|                                                                               | <i>ntra/ntra</i>      | → | <i>ntra/ntra</i> | <i>ntra/ntra</i> | <i>ntra/ntra</i>   |
|                                                                               | <i>ntrb/ntrb</i>      |   | <i>ntrb/ntrb</i> | <i>ntrb/ntrb</i> | <i>ntrb/ntrb</i>   |
|                                                                               | Frequency             |   | <b>27</b>        | <b>30</b>        | <b>0</b>           |
| 57 progeny were genotyped by PCR. $\chi^2$ for 1:1 segregation: 0.158; P=0.69 |                       |   |                  |                  |                    |
